# Supplementary material for: Interventions to Improve Metabolic Risk Screening Among Adult Patients Taking Antipsychotic Medication: A Systematic Review
Source: Atypon-hosted journal article supplement (doi:10.1176/appi.ps.201900108), 2019-09-16
Supplement: appi.ps.201900108.ds001.pdf [file appi.ps.201900108.ds001.pdf]

Flow chart of the search process and study selection according to PRISMA guidelines

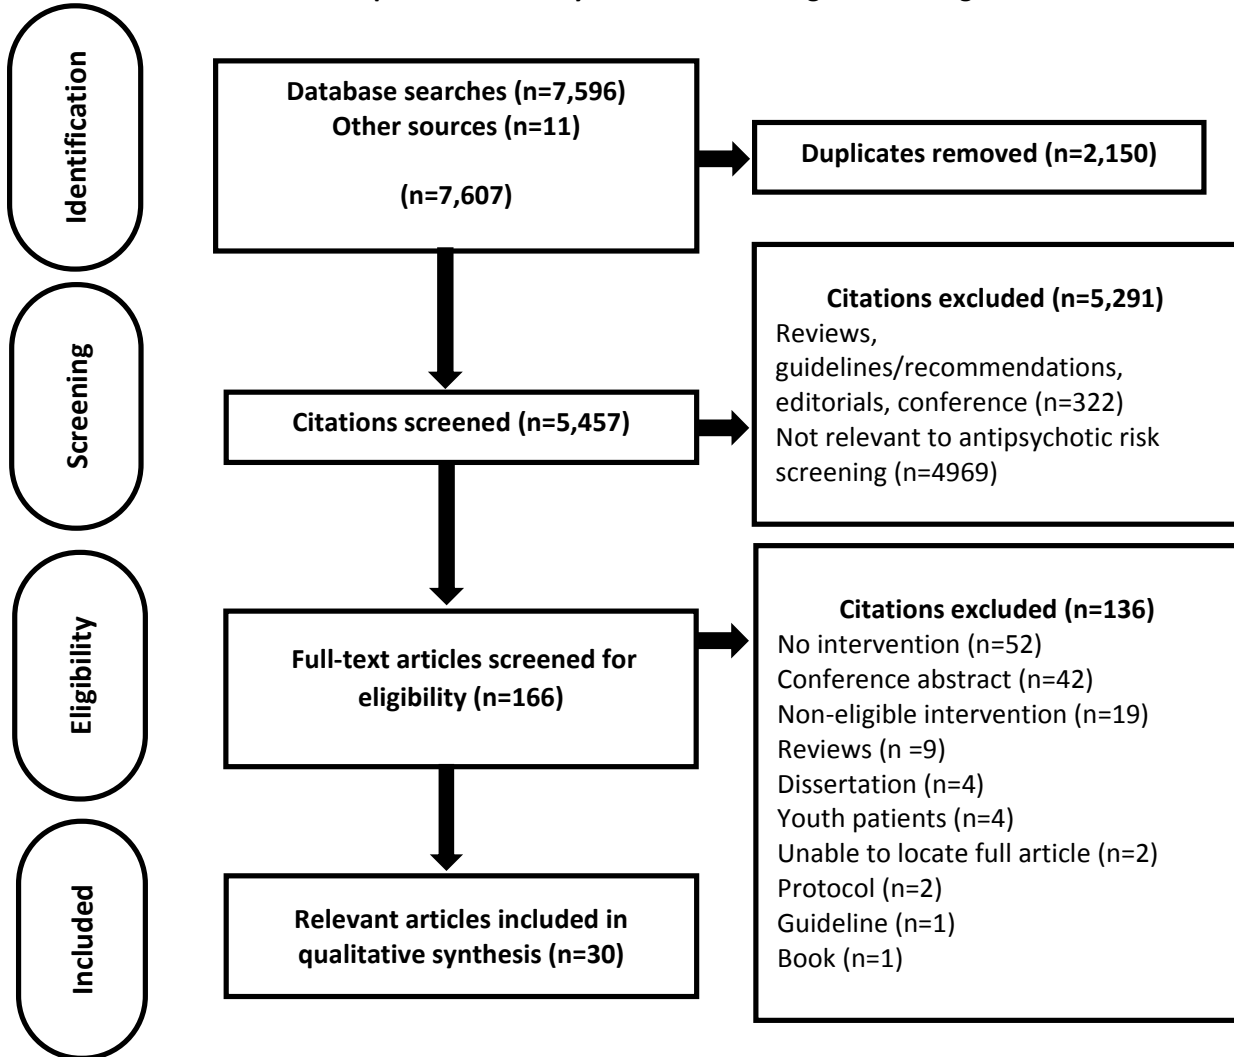

**Metabolic risk screening rates reported by interventions (given in % unless specified otherwise)**

| Study                             | Glu C | Glu I | Lipids C | Lipids I | WC C | WC I  | Weight C | Weight I | BP C  | BP I | All 4 C | All 4 I |
|-----------------------------------|-------|-------|----------|----------|------|-------|----------|----------|-------|------|---------|---------|
| Abdallah et al.                   | 42.0  | 97.0  | 25.0     | 55.0     | NA   | NA    | 0        | 68.0     | 10.0  | 68.0 | NA      | NA      |
| Barnes et al. (2008)              | 28.0  | 38.0  | 22.0     | 35.0     | NA   | NA    | 17.0     | 34.0     | 26.0  | 43.0 | 11.0    | 23.0    |
| Barnes et al. (2015)              | 28.0  | 52.0  | 22.0     | 50.0     | NA   | NA    | 17.0     | 58.0     | 26.0  | 59.0 | 11.0    | 34.0    |
| Cotes et al. <sup>d</sup>         | 45.0  | 43.0  | 32.0     | 37.0     | 7.0  | 7.0   | 52.0     | 65.0     | 33.0  | 38.0 | NA      | NA      |
| DelMonte et al. / Lee et al.      | 92.4  | 100   | 28.7     | 70.5     | NA   | NA    | NA       | NA       | NA    | NA   | NA      | NA      |
| Fischler et al.                   | NA    | NA    | NA       | NA       | NA   | NA    | NA       | NA       | NA    | NA   | 36.0    | 56.3    |
| Gallagher et al.                  | 45.0  | 85.0  | 52.5     | 85.0     | 0    | 78.0  | 2.5      | 80.0     | 2.5   | 80.0 | NA      | NA      |
| Gill et al.                       | 9.0   | 61.0  | 9.0      | 61.0     | 4.0  | 96.0  | 4.0      | 96.0     | 4.0   | 96.0 | NA      | NA      |
| Gonzalez et al.                   | 24.6  | 72.6  | 7.1      | 52.8     | NA   | NA    | NA       | NA       | NA    | NA   | NA      | NA      |
| Green et al.                      | NA    | NA    | NA       | NA       | NA   | NA    | 21.6     | 58.6     | 22.4  | 75.9 | NA      | NA      |
| Gumber et al. <sup>d</sup>        | 92.0  | 82.0  | 99.0     | 97.0     | 99.0 | 100.0 | 99.0     | 100.0    | 100.0 | 99.0 | NA      | NA      |
| Hinds et al.                      | 14.2  | 12.8  | NA       | NA       | NA   | NA    | NA       | NA       | NA    | NA   | NA      | NA      |
| Hor et al.                        | 6.0   | 43.8  | 5.7      | 43.8     | 0.7  | 40.6  | 0        | 46.9     | 82.0  | 93.8 | NA      | NA      |
| Kioko et al.                      | 22.0  | 62.0  | 22.0     | 62.0     | NA   | NA    | 76.0     | 82.0     | 76.0  | 82.0 | NA      | NA      |
| Kirchner et al.                   | 53.0  | 80.0  | 29.0     | 67.0     | NA   | NA    | 70.0     | 93.0     | NA    | NA   | NA      | NA      |
| Kreyenbuhl et al. <sup>a, d</sup> | 96.2  | 97.7  | 94.4     | 95.1     | NA   | NA    | 76.1     | 81.4     | 78.5  | 83.5 | NA      | NA      |
| Lai et al. <sup>b</sup>           | NA    | NA    | NA       | NA       | NA   | NA    | NA       | NA       | NA    | NA   | 5.0     | 11.0    |
| Latoo et al.                      | NA    | NA    | NA       | NA       | NA   | NA    | NA       | NA       | NA    | NA   | 7.3     | 40.4    |
| Lui et al.                        | NA    | NA    | NA       | NA       | NA   | NA    | NA       | NA       | NA    | NA   | 2.4     | 100.0   |
| Nicol et al.                      | 46.0  | 90.0  | NA       | NA       | NA   | NA    | NA       | NA       | NA    | NA   | NA      | NA      |
| Osborn et al. (Full)              | 12.0  | 66.7  | 12.0     | 66.7     | NA   | NA    | 9.0      | 92.5     | 10.0  | 96.2 | NA      | NA      |
| Osborn et al. (Partial)           | 8.0   | 36.5  | 8.0      | 26.9     | NA   | NA    | 20.0     | 65.2     | 21.0  | 68.2 | NA      | NA      |
| Ramanuj                           | 50.0  | 80.0  | 25.0     | 60.0     | NA   | NA    | NA       | NA       | NA    | NA   | NA      | NA      |
| Runcie et al. <sup>d</sup>        | 49.0  | 46.0  | NA       | NA       | NA   | NA    | 45.0     | 49.0     | NA    | NA   | NA      | NA      |
| Thompson et al.                   | NA    | NA    | NA       | NA       | NA   | NA    | NA       | NA       | NA    | NA   | 22.1    | 81.4    |
| Tully et al.                      | 43.2  | 64.8  | 52.7     | 70.3     | 0    | 97.9  | NA       | NA       | 91.8  | 97.2 | NA      | NA      |
| Vasudev et al.                    | NA    | NA    | NA       | NA       | NA   | NA    | NA       | NA       | NA    | NA   | 20.0    | 58.0    |
| Velligan et al. <sup>c</sup>      | NA    | NA    | NA       | NA       | NA   | NA    | NA       | NA       | NA    | NA   | 4       | 80.0    |
| Wiechers et al.                   | 15.0  | 55.0  | 14.0     | 55.0     | NA   | NA    | 5.0      | 44.0     | 4.0   | 39.0 | NA      | NA      |

|               |      |      |      |      |    |    |      |      |      |      |    |    |
|---------------|------|------|------|------|----|----|------|------|------|------|----|----|
| Wilson et al. | 13.1 | 87.4 | 13.1 | 97.4 | NA | NA | 48.6 | 88.7 | 15.9 | 92.7 | NA | NA |
|---------------|------|------|------|------|----|----|------|------|------|------|----|----|

C- comparison group, I- intervention group, Glu- Glucose, WC-waist circumference, BP- blood pressure, All 4 – screening conducted for 4 measures of glucose, lipids, weight and blood pressure.

<sup>a</sup> – Proportion of days adherent to monitoring guidelines

<sup>b</sup>- Percentage of visits which patient was found adherent to monitoring guidelines

<sup>c</sup>- Screening rates reported for 3 items together (blood pressure, body mass index and waist circumference)

<sup>d</sup>- Studies with null effect on metabolic risk screening rates

### Quality assessment of included studies

| Study                                        | Selection bias <sup>a</sup> | Study design | Confounders | Blinding | Data collection method | Withdrawal and drop outs | Global rating <sup>b</sup> |
|----------------------------------------------|-----------------------------|--------------|-------------|----------|------------------------|--------------------------|----------------------------|
| Abdallah et al. (2016)                       | 2                           | 3            | 3           | 2        | 1                      | NA                       | 3<br>Weak                  |
| Barnes et al. (2008)                         | 2                           | 3            | 1           | 3        | 2                      | NA                       | 3<br>Weak                  |
| Barnes et al. (2015)                         | 2                           | 2            | 1           | 3        | 1                      | NA                       | 2<br>Moderate              |
| Cotes et al. (2015)                          | 1                           | 3            | 2           | 2        | 1                      | NA                       | 2<br>Moderate              |
| DelMonte et al. (2012)/<br>Lee et al. (2016) | 1                           | 3            | 1           | 2        | 1                      | NA                       | 2<br>Moderate              |
| Fischler et al. (2016)                       | 1                           | 3            | 3           | 3        | 1                      | NA                       | 3<br>Weak                  |
| Gallagher et al. (2013)                      | 2                           | 3            | 1           | 2        | 1                      | NA                       | 2<br>Moderate              |
| Gill et al. (2016)                           | 1                           | 2            | 3           | 2        | 1                      | NA                       | 2<br>Moderate              |
| Gonzalez et al. (2010)                       | 1                           | 3            | 1           | 2        | 1                      | NA                       | 2<br>Moderate              |
| Green et al. (2018)                          | 1                           | 3            | 3           | 2        | 1                      | NA                       | 3<br>Weak                  |
| Gumber et al. (2010)                         | 2                           | 3            | 3           | 2        | 1                      | NA                       | 3<br>Weak                  |
| Hinds et al. (2015)                          | 2                           | 2            | 3           | 2        | 1                      | 2                        | 2<br>Moderate              |
| Hor et al. (2016)                            | 2                           | 3            | 3           | 2        | 1                      | NA                       | 3<br>Weak                  |
| Kioko et al. (2016)                          | 2                           | 3            | 3           | 2        | 1                      | NA                       | 3<br>Weak                  |
| Kirchner et al. (2016)                       | 1                           | 3            | 3           | 2        | 1                      | NA                       | 3<br>Weak                  |
| Kreyenbuhl et al. (2016)                     | 3                           | 1            | 1           | 2        | 1                      | 1                        | 2<br>Moderate              |
| Lai et al. (2015)                            | 2                           | 2            | 1           | 2        | 3                      | 1                        | 2<br>Moderate              |
| Latoo et al. (2015)                          | 1                           | 3            | 2           | 2        | 1                      | NA                       | 2<br>Moderate              |
| Lui et al. (2016)                            | 1                           | 3            | 3           | 2        | 1                      | NA                       | 3<br>Weak                  |
| Nicol et al. (2011)                          | 2                           | 2            | 3           | 2        | 1                      | NA                       | 2<br>Moderate              |
| Osborn et al. (2010)                         | 1                           | 1            | 1           | 3        | 1                      | 3                        | 3<br>Weak                  |
| Ramanuj (2013)                               | 2                           | 3            | 1           | 2        | 1                      | NA                       | 2<br>Moderate              |

| Study                  | Selection bias | Study design | Confounders | Blinding | Data collection method | Withdrawal and drop outs | Global rating |
|------------------------|----------------|--------------|-------------|----------|------------------------|--------------------------|---------------|
| Runcie et al. (2007)   | 1              | 3            | 3           | 2        | 2                      | NA                       | 3<br>Weak     |
| Thompson et al. (2011) | 2              | 3            | 3           | 2        | 1                      | NA                       | 3<br>Weak     |
| Tully et al. (2012)    | 3              | 3            | 3           | 2        | 2                      | NA                       | 3<br>Weak     |
| Vasudev et al. (2010)  | 1              | 3            | 3           | 2        | 2                      | NA                       | 3<br>Weak     |
| Velligan et al. (2013) | 2              | 2            | 3           | 2        | 2                      | NA                       | 2<br>Moderate |
| Wiechers et al. (2012) | 1              | 3            | 3           | 2        | 2                      | NA                       | 3<br>Weak     |
| Wilson et al. (2014)   | 2              | 3            | 3           | 2        | 2                      | NA                       | 3<br>Weak     |

<sup>a</sup> Each of the 6 domains (selection, design, cofounders, blinding, data collection, withdrawal) is rated according to a standardized guide as 1- strong, 2-moderate or 3-weak.

<sup>b</sup> Each study is given a global rating according to the number of domains with a weak rating. Studies without any weak domains are rated strong, studies with 1 weak domain are rated moderate and studies with 2 or more weak domains are rated as weak.

## Search Strategy

| #   | Query                                                                                                                                                                                                                                                                                                                                                                                                                       | Limiters/Expanders            |
|-----|-----------------------------------------------------------------------------------------------------------------------------------------------------------------------------------------------------------------------------------------------------------------------------------------------------------------------------------------------------------------------------------------------------------------------------|-------------------------------|
|     |                                                                                                                                                                                                                                                                                                                                                                                                                             | Limiters - Published Date     |
|     |                                                                                                                                                                                                                                                                                                                                                                                                                             | : 20161001-20181231           |
| S87 | S81 AND S85                                                                                                                                                                                                                                                                                                                                                                                                                 | Search modes - Boolean/Phrase |
| S86 | S81 AND S85                                                                                                                                                                                                                                                                                                                                                                                                                 | Search modes - Boolean/Phrase |
| S85 | S59 OR S60 OR S61 OR S84                                                                                                                                                                                                                                                                                                                                                                                                    | Search modes - Boolean/Phrase |
| S84 | S82 AND S83                                                                                                                                                                                                                                                                                                                                                                                                                 | Search modes - Boolean/Phrase |
| S83 | S62 OR S63 OR S64 OR S65 OR S66 OR S67 OR S68 OR S69 OR S70<br>OR S71 OR S72 OR S73 OR S74 OR S75 OR S76 OR S77 OR S78                                                                                                                                                                                                                                                                                                      | Search modes - Boolean/Phrase |
| S82 | S79 OR S80                                                                                                                                                                                                                                                                                                                                                                                                                  | Search modes - Boolean/Phrase |
| S81 | S1 OR S2 OR S3 OR S4 OR S5 OR S6 OR S7 OR S8 OR S9 OR S10 OR<br>S11 OR S12 OR S13 OR S14 OR S15 OR S16 OR S17 OR S18 OR S19<br>OR S20 OR S21 OR S22 OR S23 OR S24 OR S25 OR S26 OR S27 OR<br>S28 OR S29 OR S30 OR S31 OR S32 OR S33 OR S34 OR S35 OR S36<br>OR S37 OR S38 OR S39 OR S40 OR S41 OR S42 OR S43 OR S44 OR<br>S45 OR S46 OR S47 OR S48 OR S49 OR S50 OR S51 OR S52 OR S53<br>OR S54 OR S55 OR S56 OR S57 OR S58 | Search modes - Boolean/Phrase |
| S80 | track*                                                                                                                                                                                                                                                                                                                                                                                                                      | Search modes - Boolean/Phrase |
| S79 | monitor*                                                                                                                                                                                                                                                                                                                                                                                                                    | Search modes - Boolean/Phrase |
| S78 | "body weight"                                                                                                                                                                                                                                                                                                                                                                                                               | Search modes - Boolean/Phrase |
| S77 | (MH "Body Weight+")                                                                                                                                                                                                                                                                                                                                                                                                         | Search modes - Boolean/Phrase |
| S76 | "waist-hip ratio"                                                                                                                                                                                                                                                                                                                                                                                                           | Search modes - Boolean/Phrase |
| S75 | "skinfold thickness"                                                                                                                                                                                                                                                                                                                                                                                                        | Search modes - Boolean/Phrase |
| S74 | (MH "Skinfold Thickness")                                                                                                                                                                                                                                                                                                                                                                                                   | Search modes - Boolean/Phrase |

|     |                                    |                               |
|-----|------------------------------------|-------------------------------|
| S73 | "body size"                        | Search modes - Boolean/Phrase |
| S72 | "body mass index"                  | Search modes - Boolean/Phrase |
| S71 | "body fat distribution"            | Search modes - Boolean/Phrase |
| S70 | (MH "Adipose Tissue Distribution") | Search modes - Boolean/Phrase |
| S69 | "blood glucose"                    | Search modes - Boolean/Phrase |
| S68 | "cholesterol"                      | Search modes - Boolean/Phrase |
| S67 | (MH "Blood Pressure+")             | Search modes - Boolean/Phrase |
| S66 | (MH "Metabolism+")                 | Search modes - Boolean/Phrase |
| S65 | (MH "Hemoglobin A, Glycosylated")  | Search modes - Boolean/Phrase |
| S64 | (MH "Body Weights and Measures+")  | Search modes - Boolean/Phrase |
| S63 | (MH "Blood Glucose")               | Search modes - Boolean/Phrase |
| S62 | (MH "Cholesterol+")                | Search modes - Boolean/Phrase |
| S61 | metaboli* N3 track*                | Search modes - Boolean/Phrase |
| S60 | metaboli* N3 measur*               | Search modes - Boolean/Phrase |
| S59 | metaboli* N3 monitor*              | Search modes - Boolean/Phrase |
| S58 | "paliperidone"                     | Search modes - Boolean/Phrase |
| S57 | "molindone hydrochloride"          | Search modes - Boolean/Phrase |
| S56 | "iloperidone"                      | Search modes - Boolean/Phrase |
| S55 | "asenapine"                        | Search modes - Boolean/Phrase |
| S54 | "butyrophenone*"                   | Search modes - Boolean/Phrase |

|     |                          |                               |
|-----|--------------------------|-------------------------------|
| S53 | "phenothiazine*"         | Search modes - Boolean/Phrase |
| S52 | "tetrabenazine"          | Search modes - Boolean/Phrase |
| S51 | "spiroperidol"           | Search modes - Boolean/Phrase |
| S50 | "quetiapine"             | Search modes - Boolean/Phrase |
| S49 | "olanzapine"             | Search modes - Boolean/Phrase |
| S48 | "nialamide"              | Search modes - Boolean/Phrase |
| S47 | "triflupromazine"        | Search modes - Boolean/Phrase |
| S46 | "trifluperidol"          | Search modes - Boolean/Phrase |
| S45 | "trifluoperazine"        | Search modes - Boolean/Phrase |
| S44 | "tiapride hydrochloride" | Search modes - Boolean/Phrase |
| S43 | "thiothixene"            | Search modes - Boolean/Phrase |
| S42 | "thioridazine"           | Search modes - Boolean/Phrase |
| S41 | "sulpiride"              | Search modes - Boolean/Phrase |
| S40 | "spiperone"              | Search modes - Boolean/Phrase |
| S39 | "ritanserin"             | Search modes - Boolean/Phrase |
| S38 | "risperidone"            | Search modes - Boolean/Phrase |
| S37 | "reserpine"              | Search modes - Boolean/Phrase |
| S36 | "remoxipride"            | Search modes - Boolean/Phrase |
| S35 | "raclopride"             | Search modes - Boolean/Phrase |
| S34 | "quetiapine fumarate"    | Search modes - Boolean/Phrase |



|     |                            |                               |
|-----|----------------------------|-------------------------------|
| S33 | "promazine"                | Search modes - Boolean/Phrase |
| S32 | "prochlorperazine"         | Search modes - Boolean/Phrase |
| S31 | "pimozide"                 | Search modes - Boolean/Phrase |
| S30 | "perphenazine"             | Search modes - Boolean/Phrase |
| S29 | "perazine"                 | Search modes - Boolean/Phrase |
| S28 | "penfluridol"              | Search modes - Boolean/Phrase |
| S27 | "paliperidone palmitate"   | Search modes - Boolean/Phrase |
| S26 | "ondansetron"              | Search modes - Boolean/Phrase |
| S25 | "molindone"                | Search modes - Boolean/Phrase |
| S24 | "methotrimeprazine"        | Search modes - Boolean/Phrase |
| S23 | "methiothepin"             | Search modes - Boolean/Phrase |
| S22 | "mesoridazine"             | Search modes - Boolean/Phrase |
| S21 | "chlorprothixene"          | Search modes - Boolean/Phrase |
| S20 | "lurasidone hydrochloride" | Search modes - Boolean/Phrase |
| S19 | "loxapine"                 | Search modes - Boolean/Phrase |
| S18 | "haloperidol"              | Search modes - Boolean/Phrase |
| S17 | "fluspirilene"             | Search modes - Boolean/Phrase |
| S16 | "fluphenazine"             | Search modes - Boolean/Phrase |
| S15 | "flupenthixol"             | Search modes - Boolean/Phrase |
| S14 | "etazolate"                | Search modes - Boolean/Phrase |

|     |                              |                               |
|-----|------------------------------|-------------------------------|
| S13 | "droperidol"                 | Search modes - Boolean/Phrase |
| S12 | "clozapine"                  | Search modes - Boolean/Phrase |
| S11 | "clopenthixol"               | Search modes - Boolean/Phrase |
| S10 | "chlorpromazine"             | Search modes - Boolean/Phrase |
| S9  | "butaclamol"                 | Search modes - Boolean/Phrase |
| S8  | "benperidol"                 | Search modes - Boolean/Phrase |
| S7  | "azaperone"                  | Search modes - Boolean/Phrase |
| S6  | "aripiprazole"               | Search modes - Boolean/Phrase |
| S5  | "acepromazine"               | Search modes - Boolean/Phrase |
| S4  | "neuroleptic*"               | Search modes - Boolean/Phrase |
| S3  | "antipsychotic*"             | Search modes - Boolean/Phrase |
| S2  | "anti-psychotic*"            | Search modes - Boolean/Phrase |
| S1  | (MH "Antipsychotic Agents+") | Search modes - Boolean/Phrase |
